# Supplementary material for: Controlled synthesis and photostability of blue emitting Cs3Bi2Br9 perovskite nanocrystals by employing weak polar solvents at room temperature
Source: Royal Society of Chemistry journal article supplement (doi:10.1039/c9tc00400a), 2019-01-01
Supplement: c9tc00400a1.pdf [file c9tc00400a1.pdf]

## Supporting Information for

# Controlled Synthesis and Photostability of Blue Emitting Cs<sub>3</sub>Bi<sub>2</sub>Br<sub>9</sub> Perovskite Nanocrystals

## Employing Weak-Polar Solvent at Room

Mingyang Gao,<sup>ab</sup> Chi Zhang,<sup>acd</sup> Linyuan Lian,<sup>ae</sup> Jianwei Guo,<sup>a</sup> Yong Xia,<sup>ae</sup> Fan Pan,<sup>a</sup> Xiaoming Su,<sup>a</sup> Jianbing Zhang,<sup>ae</sup>  
Honglang Li,<sup>\*f</sup> and Daoli Zhang<sup>\*abg</sup>

### Contents

Fig S1. PL spectra of pure solvent and ligands under 350nm UV light excitation (a) PL spectra of OA and toluene, (b) PL spectra of protonated OLA and toluene..... **Error! Bookmark not defined.**

---

*a. School of Optical and Electronic Information, Huazhong University of Science and Technology, 1037 Luoyu Road, Hongshan District, Wuhan City, Hubei Province, 430074, P. R. China. \*E-mail: [zhang\\_daoli@hust.edu.cn](mailto:zhang_daoli@hust.edu.cn)*

*b. China-EU Institute for Clean and Renewable Energy, Huazhong University of Science and Technology, 1037 Luoyu Road, Hongshan District, Wuhan Hubei 430074, P. R. China.*

*c. Materials Sciences Division, Lawrence Berkeley National Laboratory, 1 Cyclotron Road, Berkeley, CA 94720, United States.*

*d. Department of Materials Science and Engineering, University of California, Berkeley, CA 94720, United States.*

*e. Engineering Research Centre for Functional Ceramics, the Ministry of Education, Huazhong University of Science and Technology, 1037 Luoyu Road, Hongshan District, Wuhan Hubei 430074, P. R. China.*

*f. Institute of Acoustics, Chinese Academy of Sciences, 21 North 4<sup>th</sup> Ring Road, Haidian District, Beijing, 100190, P. R. China. \*E-mail: [lh@mail.ioa.ac.cn](mailto:lh@mail.ioa.ac.cn)*

*g. Department of Chemistry and Biochemistry, University of Maryland, 8051 Regent Drive, College Park, MD 20742, United States.*

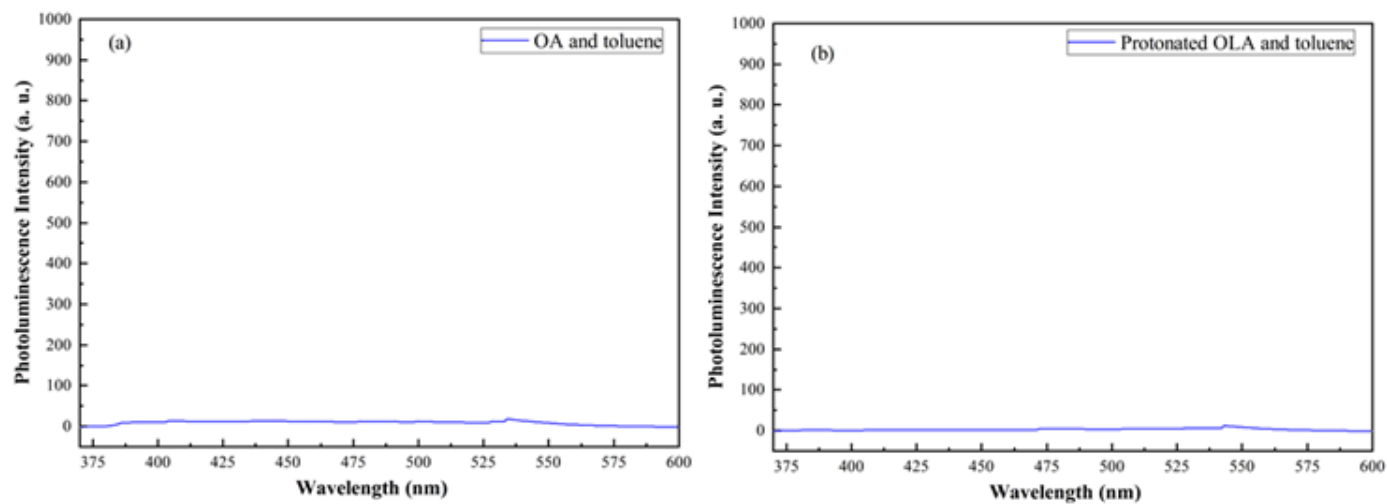

**Figure S1** PL spectra of pure solvent and ligands under 350nm UV light excitation (a) PL spectra of OA and toluene, (b) PL spectra of protonated OLA and toluene.
